# Supplementary material for: Functionalized ceria–niobium supported nickel catalysts for gas phase semi-hydrogenation of phenylacetylene to styrene
Source: Royal Society of Chemistry journal article supplement (doi:10.1039/d2cy01193j), 2022-01-01
Supplement: d2cy01193j1.pdf [file d2cy01193j1.pdf]

**Supplementary Materials (SM) for**  
**Functionalized ceria-niobium supported nickel catalysts for gas phase semi-**  
**hydrogenation of phenylacetylene to styrene**

Toyin Shittu<sup>1</sup>, Abbas Khaleel<sup>2</sup>, Kyriaki Polychronopoulou<sup>3,4</sup> Mohammednoor Altarawneh<sup>1\*</sup>,

<sup>1</sup>Department of Chemical and Petroleum Engineering, United Arab Emirates University,  
Sheikh Khalifa Bin Zayed Street, Al-Ain, 15551, United Arab Emirates

<sup>2</sup>Department of Chemistry, United Arab Emirates University,  
Sheikh Khalifa Bin Zayed Street, Al-Ain, 15551, United Arab Emirates

<sup>3</sup>Center for Catalysts and Separation, Khalifa University of Science and Technology, Abu  
Dhabi, P.O. Box 127788, United Arab Emirates.

<sup>4</sup>Department of Mechanical Engineering, Khalifa University of Science and Technology, Abu  
Dhabi, P.O. Box 127788, United Arab Emirates

\*Corresponding author's Email: [mn.altarawneh@uaeu.ac.ae](mailto:mn.altarawneh@uaeu.ac.ae)

## Content List

**Table S1.** Rate of reaction and rate constant for stand-alone cerium (IV) oxide and the supported catalysts in phenylacetylene hydrogenation at 300 °C.

**Figure S1.** TGA result for the calcined catalysts

**Figure S2.** Pore size distribution of the prepared samples, CeO<sub>2</sub> (a); Nb<sub>2</sub>O<sub>5</sub> (b); 6%Ni-Ce (c); 5%Ni-Ce (d); Ni-10%NbCe (e); and Ni-5%NbCe (f).

**Figure S3.** FTIR spectra of the pure and prepared samples.

**Figure S4.** SEM image of; , CeO<sub>2</sub> (a); Nb<sub>2</sub>O<sub>5</sub> (b); 6%Ni-Ce (c); 5%Ni-Ce (d); Ni-10%NbCe (e); and Ni-5%NbCe (f).

**Figure S5.** EDS profile of the prepared samples, CeO<sub>2</sub> (a); Nb<sub>2</sub>O<sub>5</sub> (b); 6%Ni-Ce (c); 5%Ni-Ce (d); Ni-10%NbCe (e); and Ni-5%NbCe (f).

**Figure S6.** XRD plot of the spent catalysts

**Figure S7.** Optimized geometries for the four considered Ni/Nb-ceria decorated surfaces.

**Table .S1.** Rate of reaction and rate constant for stand-alone cerium (IV) oxide and the supported catalysts in phenylacetylene hydrogenation at 300 °C.

| Catalysts      | Reaction rate ( $\text{mol}\cdot\text{s}^{-1}\cdot\text{g}^{-1}_{\text{cat}}$ ) | Rate constant, $k$ ( $\text{L}\cdot\text{s}^{-1}\cdot\text{g}^{-1}_{\text{cat}}$ ) |
|----------------|---------------------------------------------------------------------------------|------------------------------------------------------------------------------------|
| $\text{CeO}_2$ | 0                                                                               | 0                                                                                  |
| 6NiCe          | $4.781 \times 10^{-6}$                                                          | $8.441 \times 10^{-7}$                                                             |
| 5NiCe          | $7.715 \times 10^{-6}$                                                          | $2.173 \times 10^{-6}$                                                             |
| Ni-5%NbCe      | $8.896 \times 10^{-6}$                                                          | $3.294 \times 10^{-6}$                                                             |
| Ni-10%NbCe     | $2.945 \times 10^{-6}$                                                          | $4.217 \times 10^{-7}$                                                             |

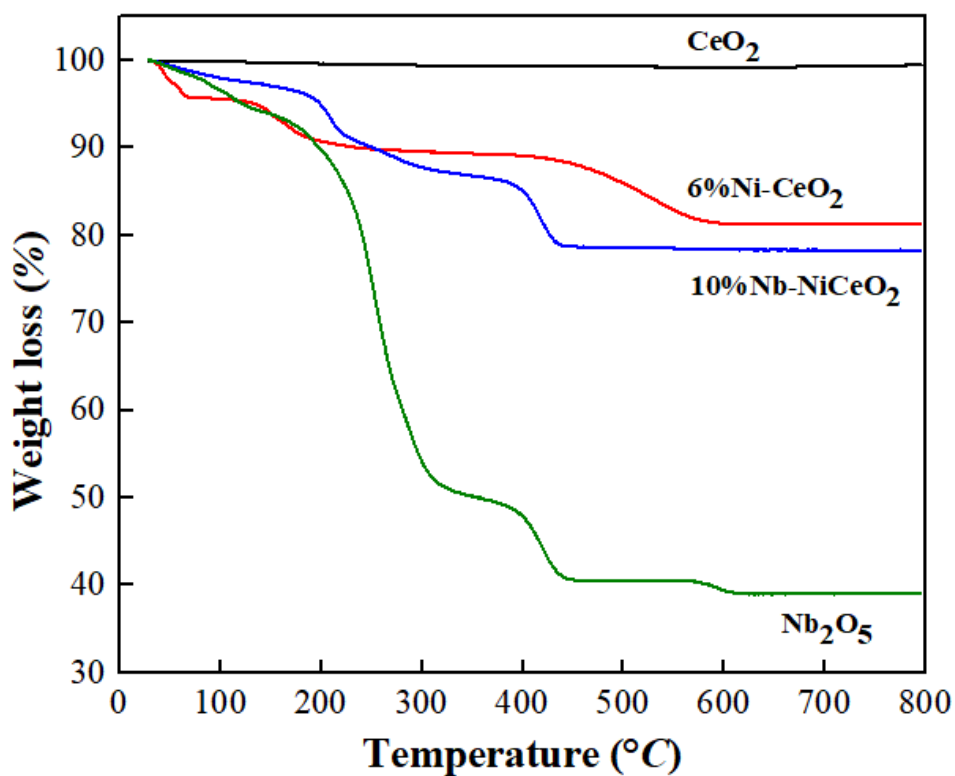

**Fig. S1.** TGA result for the calcined catalysts

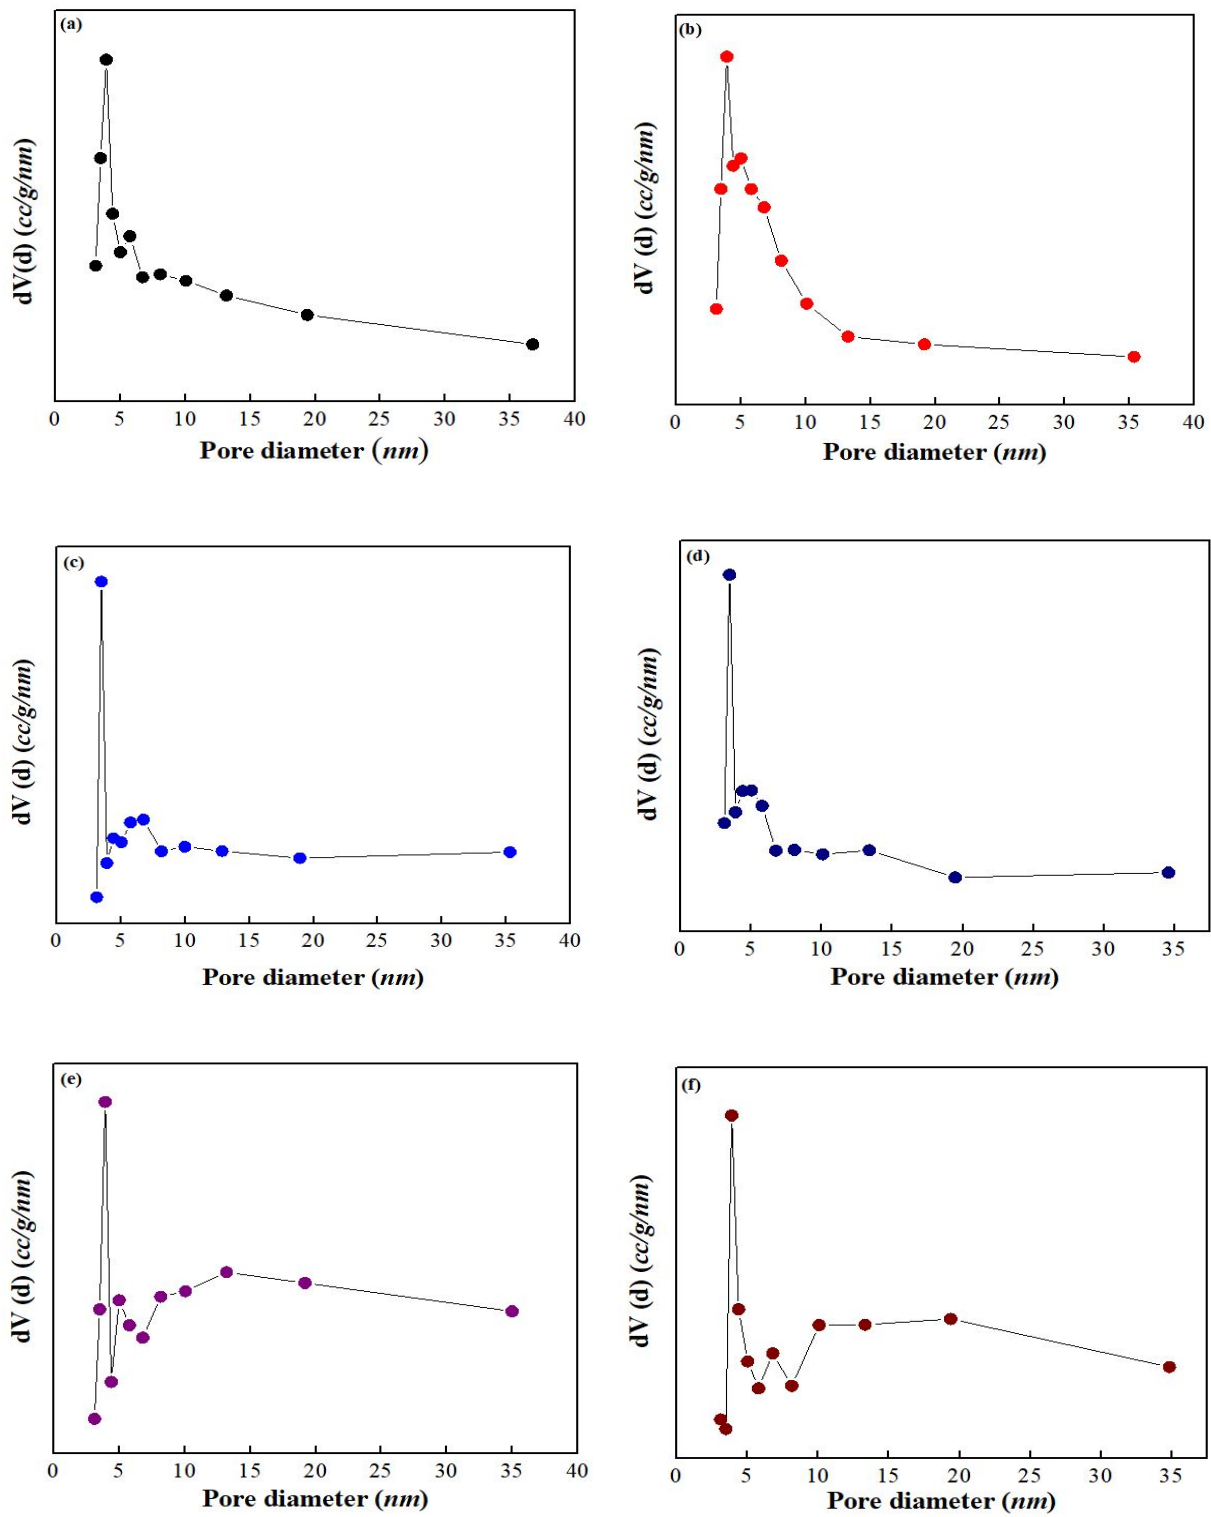

**Fig. S2** Pore size distribution of the prepared samples,  $\text{CeO}_2$  (a);  $\text{Nb}_2\text{O}_5$  (b); 6%Ni-Ce (c); 5%Ni-Ce (d); Ni-10%NbCe (e); and 5%Ni-NbCe (f).

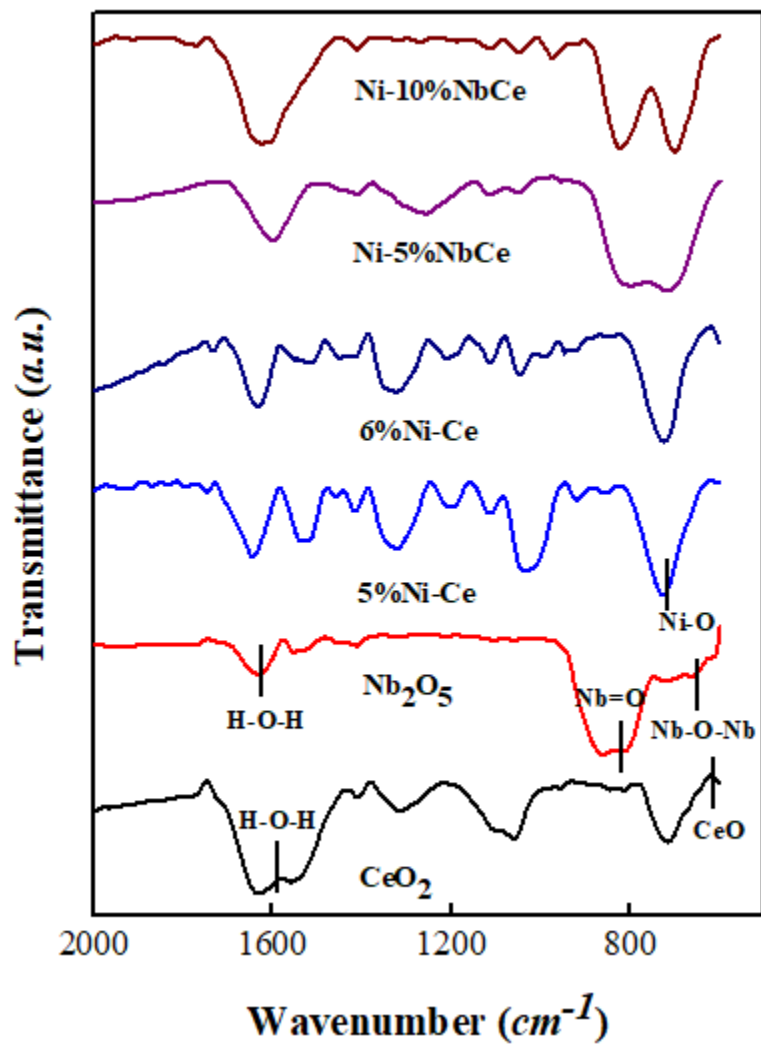

Fig. S3. FTIR spectra of the pure and prepared samples.

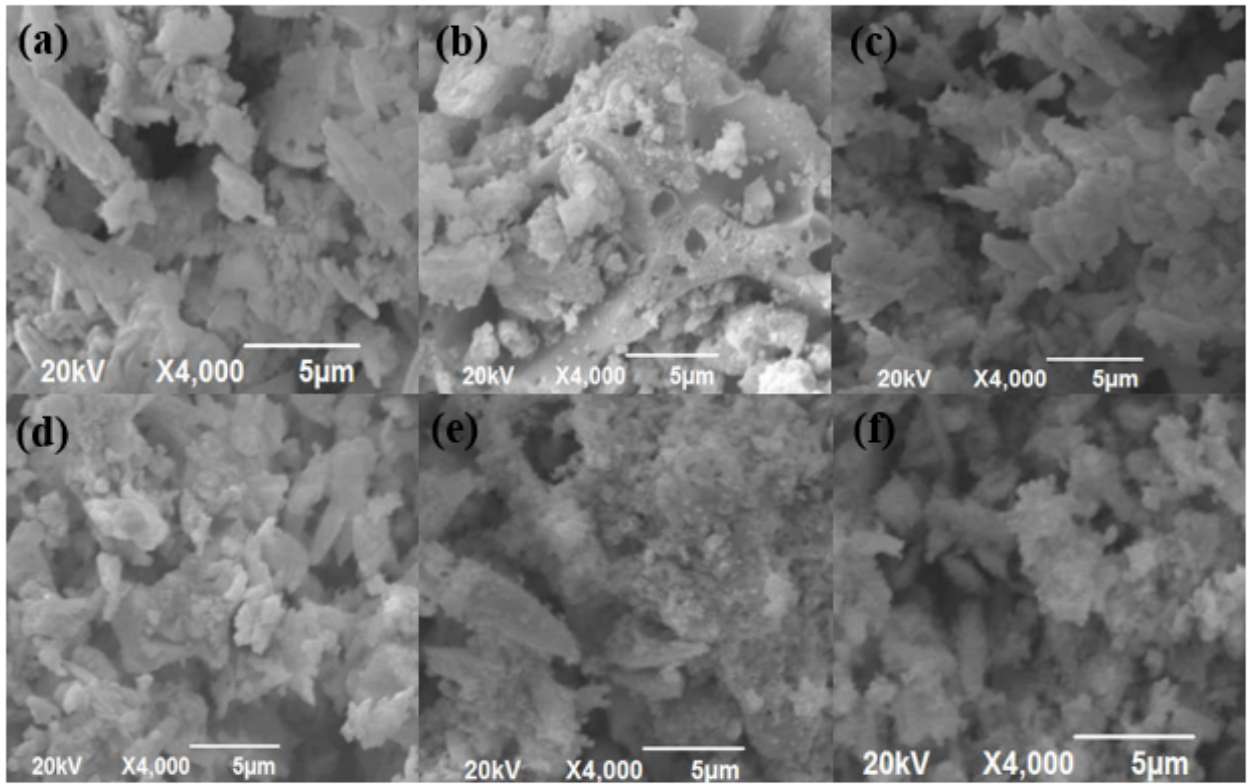

**Fig. S4.** SEM image of; CeO<sub>2</sub> (a); Nb<sub>2</sub>O<sub>5</sub> (b); 6%Ni-Ce (c); 5%Ni-Ce (d); Ni-10%NbCe (e); and Ni-5%NbCe (f).

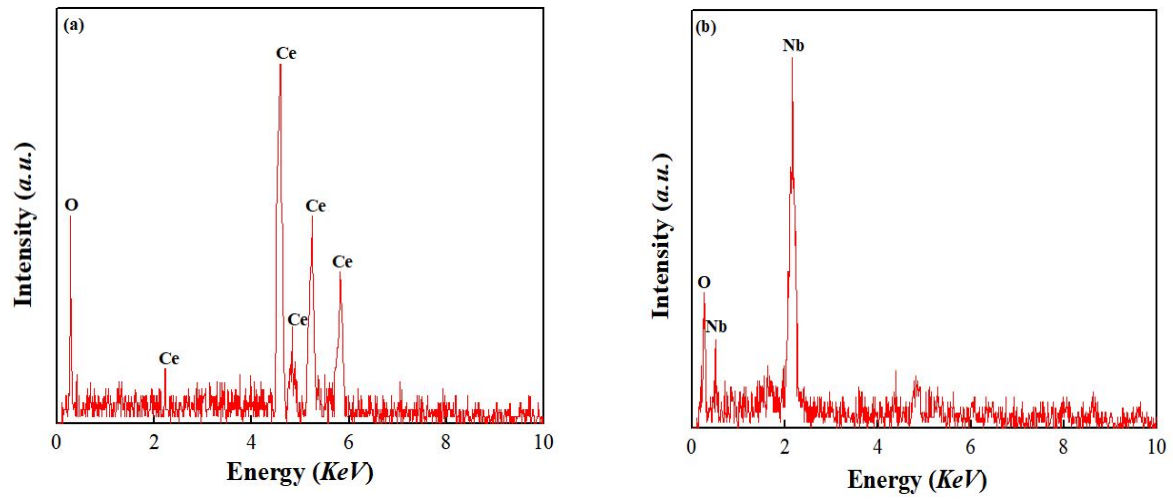

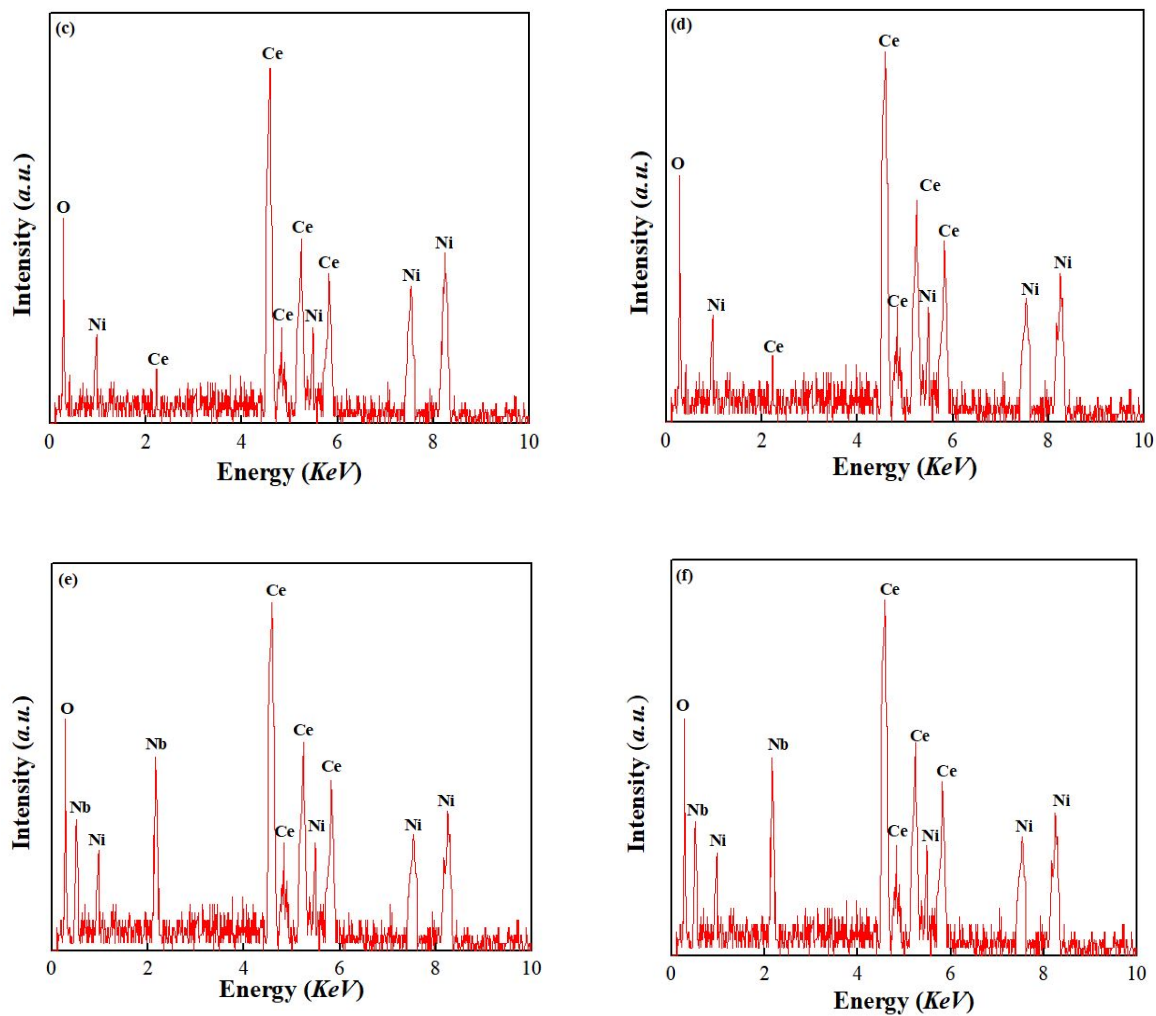

**Fig. S5.** EDS profile of the prepared samples,  $\text{CeO}_2$  (a);  $\text{Nb}_2\text{O}_5$  (b); 6%Ni-Ce (c); 5%Ni- Ce (d); Ni-10%NbCe (e); and Ni-5%NbCe (f).

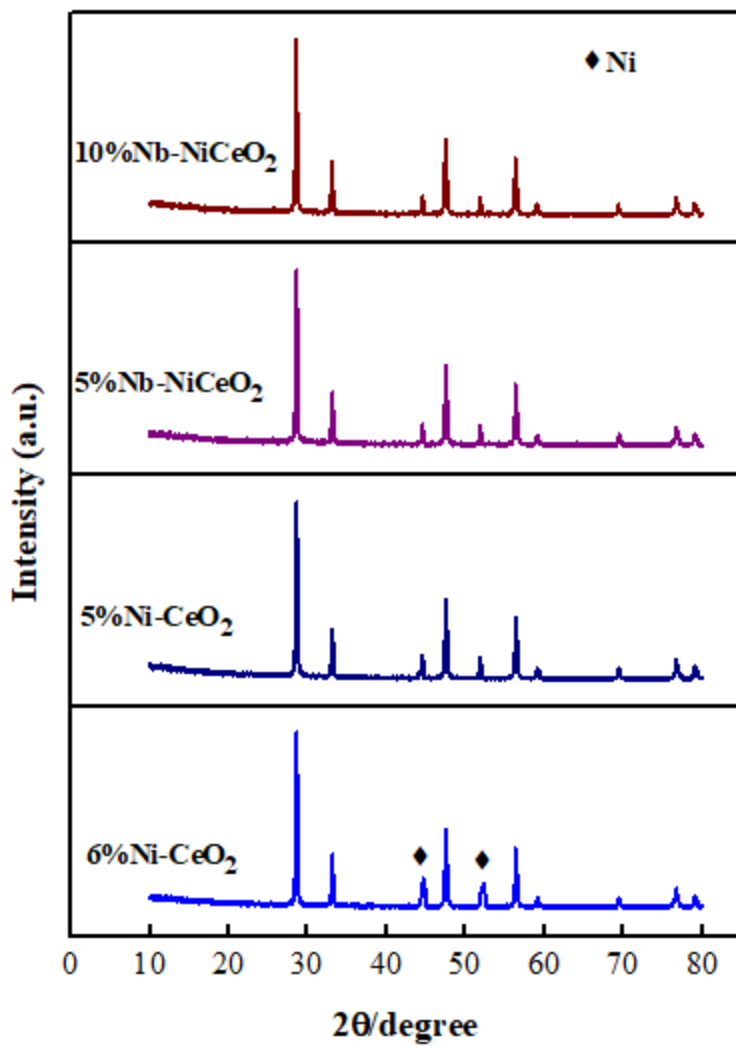

Fig. S6. XRD plot of the spent catalysts



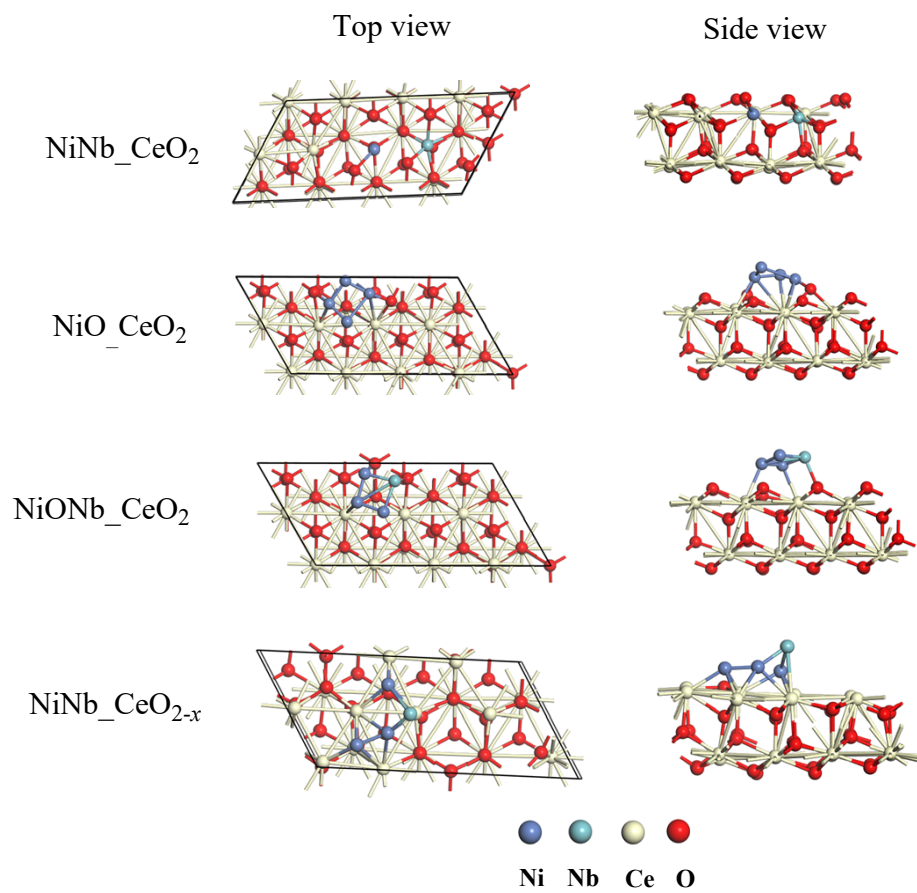

**Fig. S7.** Optimized geometries for the four considered Ni/Nb-ceria decorated surfaces.
